# Supplementary material for: Evidence for the emergence of β-trefoils by ‘Peptide Budding’ from an IgG-like β-sandwich
Source: PubMed Central journal article supplement (PMC8880906; doi:10.1371/journal.pcbi.1009833), 2022-02-14

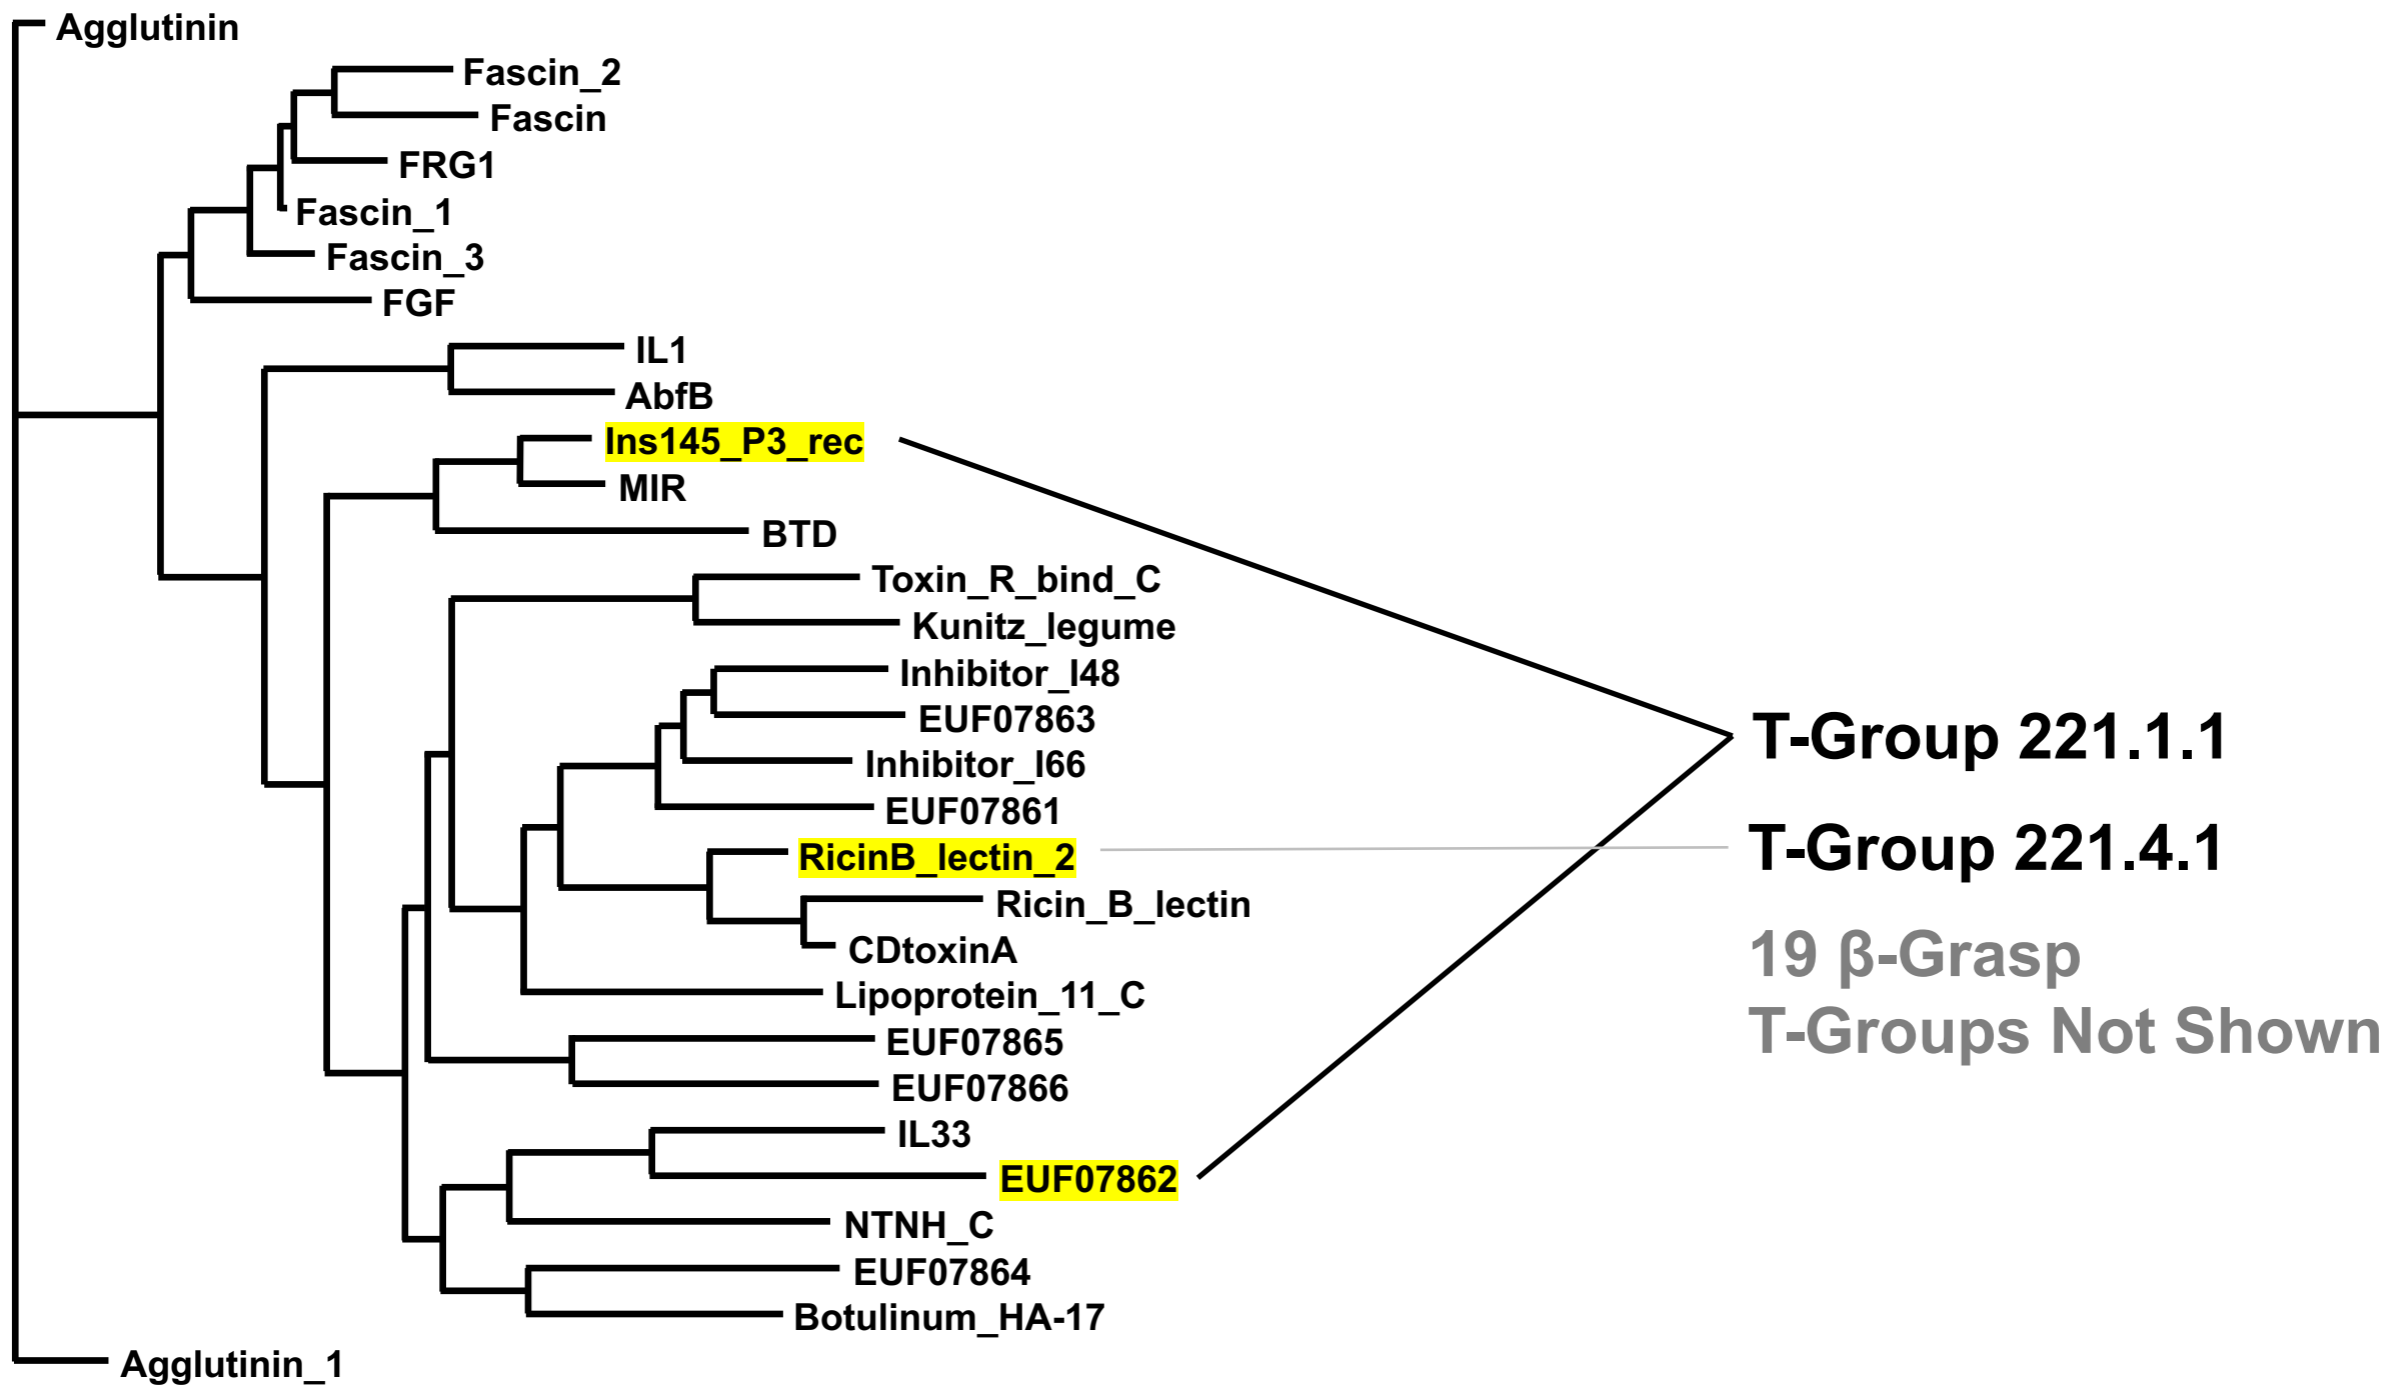

Supplement: pcbi.1009833.s004.pdf [file pcbi.1009833.s004.pdf]
