# Supplementary material for: Evidence for the emergence of β-trefoils by ‘Peptide Budding’ from an IgG-like β-sandwich
Source: PubMed Central journal article supplement (PMC8880906; doi:10.1371/journal.pcbi.1009833), 2022-02-14
Supplement: pcbi.1009833.s006.pdf [file pcbi.1009833.s006.pdf]

A

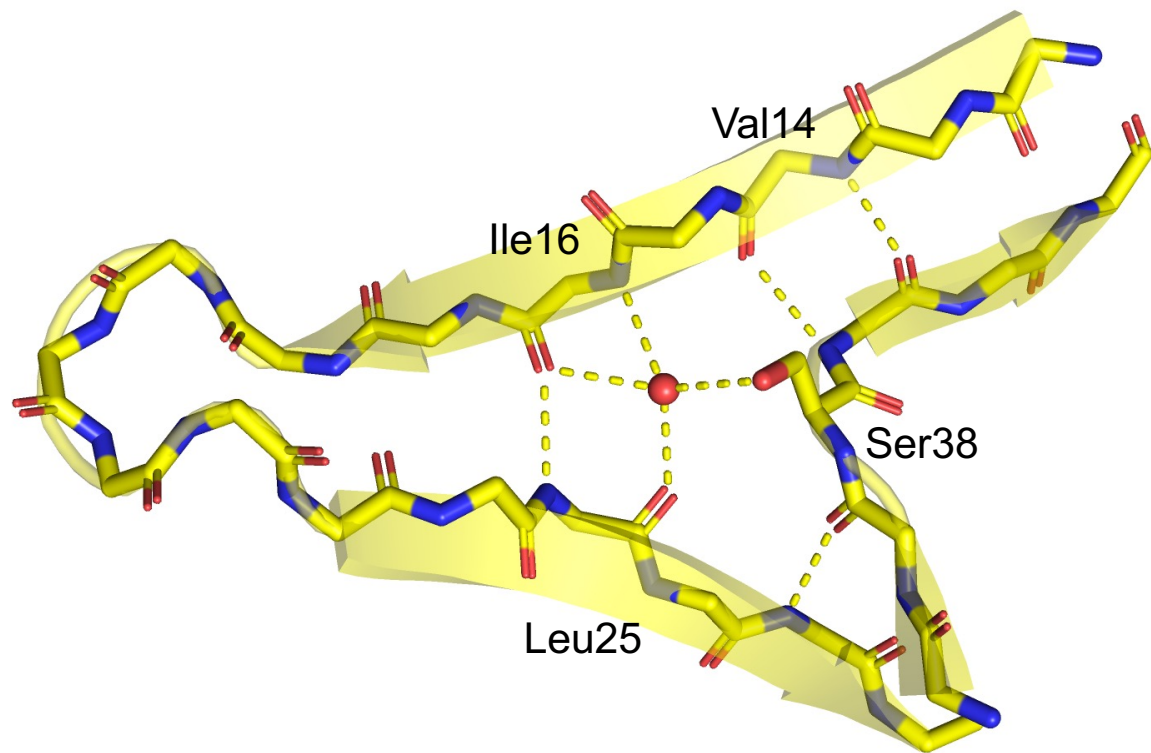

“Wet”  $\beta$ -Trefoil-like Motif

B

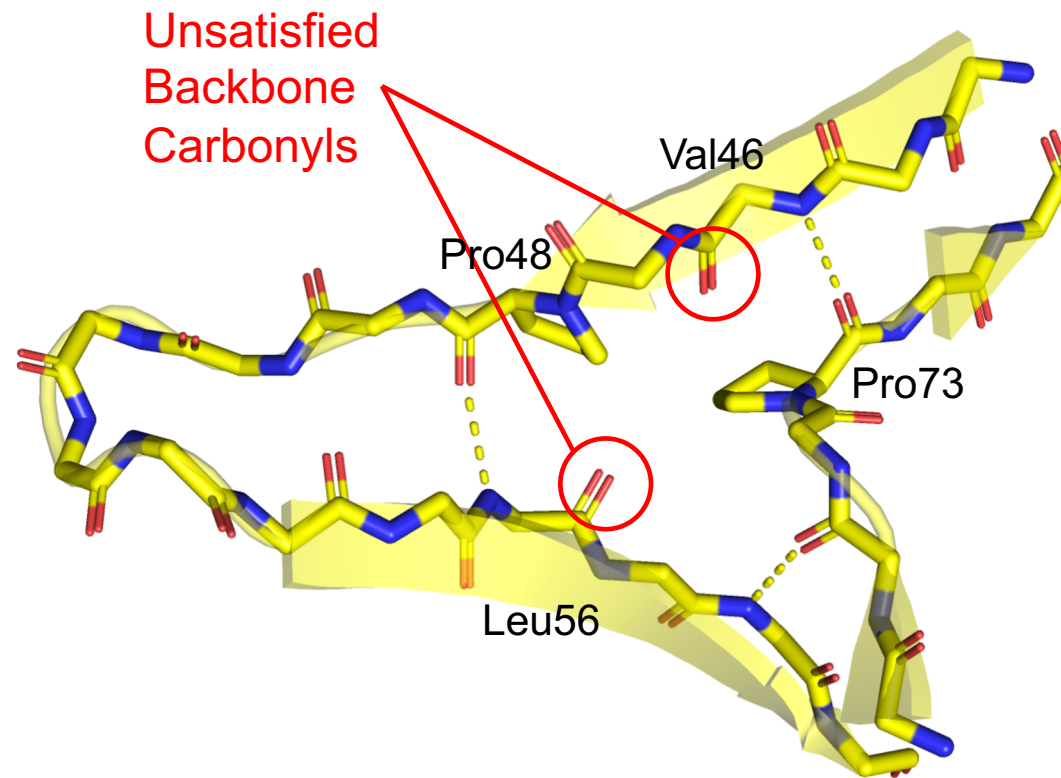

“Dry”  $\beta$ -Trefoil-like Motif
